# Supplementary material
Source: PubMed Central journal article supplement (PMC6032529)
Supplement: NIHMS941327-supplement-supplement_1.pdf [file NIHMS941327-supplement-supplement_1.pdf]

**TABLES FOR ONLINE DATA SUPPLEMENT**

**Supplement Table 1. Change in odds of offending and service use outcomes after MAT initiation versus other outpatient substance abuse treatment, schizophrenia sub-sample (n=1,554)**

|                                       | Jail |              |        | Any arrest |              |       | Felony arrest |              |       | Substance abuse hospitalization |              |        | Psychiatric hospitalization |              |        | Emergency department/Crisis |              |        | Psychiatric Medication Possession Ratio |              |       |
|---------------------------------------|------|--------------|--------|------------|--------------|-------|---------------|--------------|-------|---------------------------------|--------------|--------|-----------------------------|--------------|--------|-----------------------------|--------------|--------|-----------------------------------------|--------------|-------|
|                                       | O.R. | 95% C.I.     | p      | O.R.       | 95% C.I.     | p     | O.R.          | 95% C.I.     | p     | O.R.                            | 95% C.I.     | p      | O.R.                        | 95% C.I.     | p      | O.R.                        | 95% C.I.     | p      | O.R.                                    | 95% C.I.     | p     |
| Study group X time-period interaction | 1.38 | (1.04- 1.83) | 0.024  | 0.91       | (0.69- 1.20) | 0.495 | 1.14          | (0.59- 2.18) | 0.698 | 0.88                            | (0.58- 1.33) | 0.549  | 0.69                        | (0.48- 0.98) | 0.038  | 0.80                        | (0.65- 0.98) | 0.030  | 1.46                                    | (1.10- 1.95) | 0.009 |
| Main effects                          |      |              |        |            |              |       |               |              |       |                                 |              |        |                             |              |        |                             |              |        |                                         |              |       |
| Study group‡                          | 0.68 | (0.53- 0.89) | 0.004  | 0.91       | (0.73- 1.13) | 0.406 | 0.62          | (0.38- 1.02) | 0.059 | 3.02                            | (2.19- 4.16) | <.0001 | 1.75                        | (1.31- 2.34) | <.0001 | 1.97                        | (1.61- 2.41) | <.0001 | 0.63                                    | (0.49- 0.82) | 0.001 |
| Time period‡                          | 0.58 | (0.49- 0.68) | <.0001 | 1.07       | (0.86- 1.33) | 0.572 | 1.90          | (1.21- 2.99) | 0.006 | 0.26                            | (0.16- 0.45) | <.0001 | 0.45                        | (0.34- 0.59) | <.0001 | 0.71                        | (0.58- 0.88) | 0.001  | 0.85                                    | (0.70- 1.05) | 0.128 |

‡Models control for age, educational need, gender, primary psychiatric diagnosis, race/ethnicity, insurance (SSI, Medicaid), probation, service participation (residential, Assertive Community Treatment, outpatient mental health treatment, outpatient substance abuse treatment), medication possession ratio (prior month medication possession ratio of 80% or higher), time, and community tenure. Medication possession ratio outcome model excludes medication possession ratio covariate, includes only person-months when individuals were enrolled in Medicaid, and is restricted to individuals with any record of medication who were diagnosed with schizophrenia spectrum or bipolar disorder (n=1,035).

‡ MAT group = 1, COMP group = 0; Post-index-treatment period = 1, pre-index-treatment period = 0

Supplement Table 2. Change in odds of offending and service use outcomes after MAT initiation versus other outpatient substance abuse treatment, bipolar disorder sub-sample (n=1,551)

|                                       | Jail |              |        | Any arrest |              |       | Felony arrest |              |       | Substance abuse hospitalization |              |        | Psychiatric hospitalization 95% |              |        | Emergency department/Crisis 95% |              |        | Psychiatric Medication Possession Ratio 95% |              |       |
|---------------------------------------|------|--------------|--------|------------|--------------|-------|---------------|--------------|-------|---------------------------------|--------------|--------|---------------------------------|--------------|--------|---------------------------------|--------------|--------|---------------------------------------------|--------------|-------|
|                                       | O.R. | 95% C.I.     | p      | O.R.       | 95% C.I.     | p     | O.R.          | 95% C.I.     | p     | O.R.                            | 95% C.I.     | p      | O.R.                            | C.I.         | p      | O.R.                            | C.I.         | p      | O.R.                                        | C.I.         | p     |
| Study group X time-period interaction | 1.31 | (0.94- 1.81) | 0.107  | 0.98       | (0.75- 1.26) | 0.854 | 0.50          | (0.29- 0.86) | 0.012 | 0.98                            | (0.68- 1.41) | 0.917  | 0.78                            | (0.53- 1.15) | 0.212  | 0.93                            | (0.72- 1.21) | 0.610  | 1.65                                        | (1.21- 2.24) | 0.002 |
| Main effects                          |      |              |        |            |              |       |               |              |       |                                 |              |        |                                 |              |        |                                 |              |        |                                             |              |       |
| Study group‡                          | 0.68 | (0.51- 0.90) | 0.007  | 0.96       | (0.79- 1.17) | 0.697 | 1.32          | (0.92- 1.88) | 0.133 | 2.40                            | (1.81- 3.17) | <.0001 | 1.75                            | (1.30- 2.35) | <.0001 | 1.59                            | (1.27- 1.99) | <.0001 | 0.86                                        | (0.65- 1.15) | 0.313 |
| Time period‡                          | 0.48 | (0.41- 0.56) | <.0001 | 0.82       | (0.65- 1.03) | 0.094 | 1.73          | (1.11- 2.70) | 0.016 | 0.14                            | (0.09- 0.23) | <.0001 | 0.23                            | (0.15- 0.35) | <.0001 | 0.37                            | (0.29- 0.48) | <.0001 | 0.90                                        | (0.70- 1.15) | 0.398 |

‡Models control for age, educational need, gender, primary psychiatric diagnosis, race/ethnicity, insurance (SSI, Medicaid), probation, service participation (residential, Assertive Community Treatment, outpatient mental health treatment, outpatient substance abuse treatment), medication possession ratio (prior month medication possession ratio of 80% or higher), time, and community tenure. Medication possession ratio outcome model excludes medication possession ratio covariate, includes only person-months when individuals

‡ MAT group = 1, COMP group = 0; Post-index-treatment period = 1, pre-index-treatment period = 0

**Supplement Table 3. Change in odds of offending and service use outcomes after MAT initiation versus other outpatient substance abuse treatment, by medication possession ratio status and primary psychiatric disorder**

|                                                                          | Jail |              |        | Any arrest |              |       | Any felony arrest |              |       | Substance abuse hospitalization |              |        | Psychiatric hospitalization |              |        | Emergency department/Crisis |              |        |
|--------------------------------------------------------------------------|------|--------------|--------|------------|--------------|-------|-------------------|--------------|-------|---------------------------------|--------------|--------|-----------------------------|--------------|--------|-----------------------------|--------------|--------|
|                                                                          | O.R. | 95% C.I.     | p      | O.R.       | 95% C.I.     | p     | O.R.              | 95% C.I.     | p     | O.R.                            | 95% C.I.     | p      | O.R.                        | 95% C.I.     | p      | O.R.                        | 95% C.I.     | p      |
| <b>Sample: Schizophrenia/HIGH Medication Possession Ratio (n=405)</b>    |      |              |        |            |              |       |                   |              |       |                                 |              |        |                             |              |        |                             |              |        |
| Study group X time-period interaction                                    | 0.95 | (0.44- 2.04) | 0.900  | 0.71       | (0.36- 1.40) | 0.323 | 1.04              | (0.24- 4.45) | 0.956 | 0.57                            | (0.19- 1.69) | 0.313  | 0.49                        | (0.27- 0.91) | 0.024  | 0.91                        | (0.61- 1.34) | 0.621  |
| Main effects                                                             |      |              |        |            |              |       |                   |              |       |                                 |              |        |                             |              |        |                             |              |        |
| Study group‡                                                             | 0.61 | (0.38- 0.98) | 0.042  | 1.12       | (0.75- 1.68) | 0.592 | 0.57              | (0.21- 1.59) | 0.283 | 3.06                            | (1.67- 5.61) | 0.000  | 2.49                        | (1.55- 4.01) | 0.000  | 2.02                        | (1.41- 2.89) | 0.000  |
| Time period‡                                                             | 0.66 | (0.45- 0.96) | 0.029  | 0.83       | (0.48- 1.46) | 0.524 | 2.08              | (0.75- 5.74) | 0.159 | 0.13                            | (0.03- 0.56) | 0.006  | 0.68                        | (0.42- 1.10) | 0.118  | 0.88                        | (0.58- 1.32) | 0.524  |
| <b>Sample: Schizophrenia/LOW Medication Possession Ratio (n=564)</b>     |      |              |        |            |              |       |                   |              |       |                                 |              |        |                             |              |        |                             |              |        |
| Study group X time-period interaction                                    | 1.64 | (1.13- 2.37) | 0.009  | 1.05       | (0.70- 1.56) | 0.828 | 1.39              | (0.56- 3.48) | 0.477 | 0.92                            | (0.48- 1.75) | 0.799  | 0.96                        | (0.58- 1.56) | 0.855  | 0.89                        | (0.67- 1.19) | 0.439  |
| Main effects                                                             |      |              |        |            |              |       |                   |              |       |                                 |              |        |                             |              |        |                             |              |        |
| Study group‡                                                             | 0.65 | (0.45- 0.93) | 0.019  | 0.83       | (0.59- 1.18) | 0.301 | 0.57              | (0.26- 1.22) | 0.146 | 3.72                            | (2.10- 6.60) | <.0001 | 1.01                        | (0.66- 1.53) | 0.979  | 1.94                        | (1.44- 2.60) | <.0001 |
| Time period‡                                                             | 0.44 | (0.34- 0.57) | <.0001 | 1.07       | (0.76- 1.51) | 0.685 | 1.21              | (0.59- 2.46) | 0.608 | 0.38                            | (0.17- 0.86) | 0.021  | 0.38                        | (0.26- 0.56) | <.0001 | 0.72                        | (0.53- 0.98) | 0.037  |
| <b>Sample: Bipolar Disorder/HIGH Medication Possession Ratio (n=374)</b> |      |              |        |            |              |       |                   |              |       |                                 |              |        |                             |              |        |                             |              |        |
| Study group X time-period interaction                                    | 0.87 | (0.47- 1.60) | 0.653  | 0.70       | (0.40- 1.20) | 0.189 | 0.18              | (0.05- 0.64) | 0.008 | 0.66                            | (0.34- 1.28) | 0.219  | 0.43                        | (0.24- 0.78) | 0.005  | 0.60                        | (0.39- 0.91) | 0.016  |
| Main effects                                                             |      |              |        |            |              |       |                   |              |       |                                 |              |        |                             |              |        |                             |              |        |
| Study group‡                                                             | 0.67 | (0.41- 1.07) | 0.091  | 0.98       | (0.67- 1.43) | 0.908 | 2.14              | (1.08- 4.22) | 0.029 | 2.18                            | (1.33- 3.56) | 0.002  | 1.71                        | (1.05- 2.78) | 0.031  | 1.47                        | (1.03- 2.11) | 0.036  |
| Time period‡                                                             | 0.44 | (0.31- 0.64) | <.0001 | 0.76       | (0.47- 1.23) | 0.265 | 1.99              | (0.76- 5.18) | 0.159 | 0.16                            | (0.07- 0.39) | <.0001 | 0.46                        | (0.22- 0.97) | 0.042  | 0.55                        | (0.33- 0.92) | 0.022  |
| <b>Sample: Bipolar Disorder/LOW Medication Possession Ratio (n=532)</b>  |      |              |        |            |              |       |                   |              |       |                                 |              |        |                             |              |        |                             |              |        |
| Study group X time-period interaction                                    | 1.65 | (0.93- 2.92) | 0.084  | 1.12       | (0.75- 1.69) | 0.575 | 0.94              | (0.38- 2.33) | 0.894 | 0.76                            | (0.43- 1.34) | 0.347  | 1.25                        | (0.68- 2.29) | 0.480  | 1.05                        | (0.70- 1.56) | 0.820  |
| Main effects                                                             |      |              |        |            |              |       |                   |              |       |                                 |              |        |                             |              |        |                             |              |        |
| Study group‡                                                             | 0.66 | (0.43- 1.02) | 0.064  | 0.93       | (0.69- 1.26) | 0.637 | 0.93              | (0.51- 1.70) | 0.819 | 3.10                            | (2.01- 4.79) | <.0001 | 1.66                        | (1.03- 2.68) | 0.036  | 1.72                        | (1.18- 2.50) | 0.005  |
| Time period‡                                                             | 0.38 | (0.29- 0.51) | <.0001 | 0.65       | (0.45- 0.95) | 0.024 | 1.00              | (0.48- 2.08) | 0.994 | 0.27                            | (0.12- 0.61) | 0.002  | 0.22                        | (0.12- 0.40) | <.0001 | 0.36                        | (0.25- 0.53) | <.0001 |

‡Models control for age, educational need, gender, race/ethnicity, insurance (SSI, Medicaid), probation, service utilization (residential treatment, Assertive Community Treatment, outpatient mental health treatment, outpatient substance abuse treatment), medication possession ratio, time, and community tenure.

‡ MAT group = 1, COMP group = 0; Post-index-treatment period = 1, pre-index-treatment period = 0
